# Supplementary material for: Luminescent YbVO4 by atomic layer deposition
Source: Royal Society of Chemistry journal article supplement (doi:10.1039/c7dt00253j), 2017-01-01
Supplement: c7dt00253j1.pdf [file c7dt00253j1.pdf]

## Supplementary

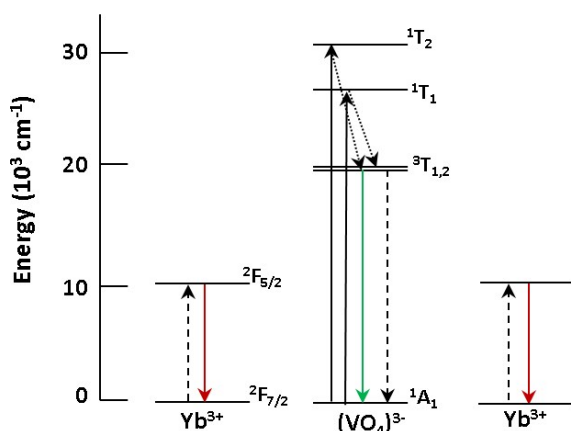

**Figure S1:** Schematic energy level diagram of  $(\text{VO}_4)^{3-}$  and  $\text{Yb}^{3+}$  in  $\text{YbVO}_4$ .<sup>8,20</sup> Black arrows show excitation, while the green and red arrows show emission processes. Relaxation from the  $^1\text{T}_{1,2}$  excited states to the  $^3\text{T}_{1,2}$  excited states is most likely non-radiative (short dash). From the  $^3\text{T}_{1,2}$  excited states, energy can transfer to two nearby  $\text{Yb}^{3+}$  via CET (dashed arrows). The positions of the energy levels are approximate.

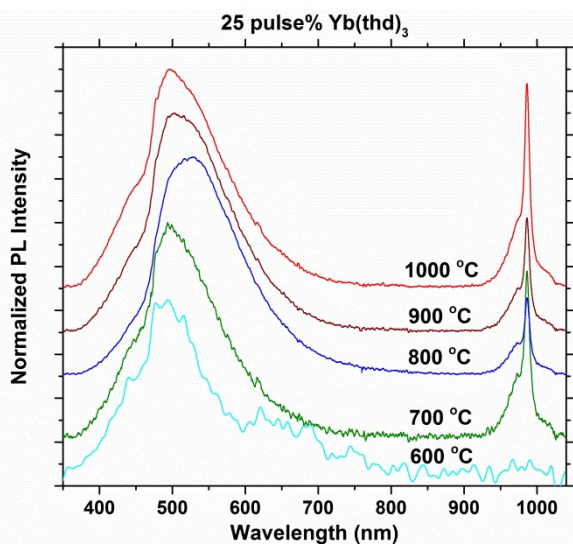

**Figure S2:** Normalized PL spectra of samples with a 1:3 pulse ratio of  $\text{Yb}(\text{thd})_3$  and  $\text{VO}(\text{thd})_2$  annealed at 600-700 °C. Measured with an

OceanOptics USB4000 photo spectrometer. No corrections have been made.

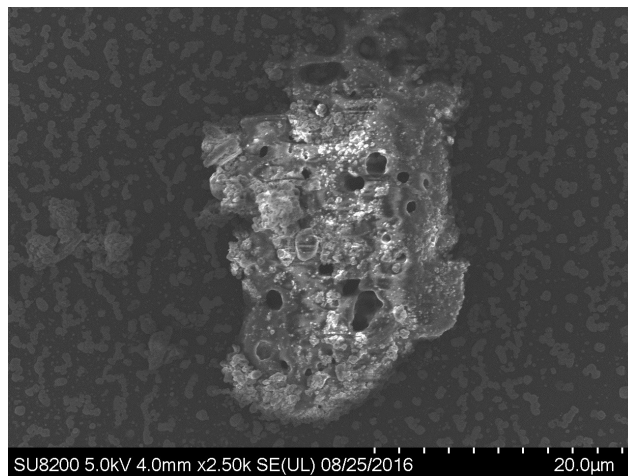

**Figure S3:** FE-SEM image of a sample with a 1:3 pulse ratio of  $\text{Yb}(\text{thd})_3$  and  $\text{VO}(\text{thd})_2$ . The amorphous material is expected to consist mostly of excess  $\text{V}_2\text{O}_5$ .

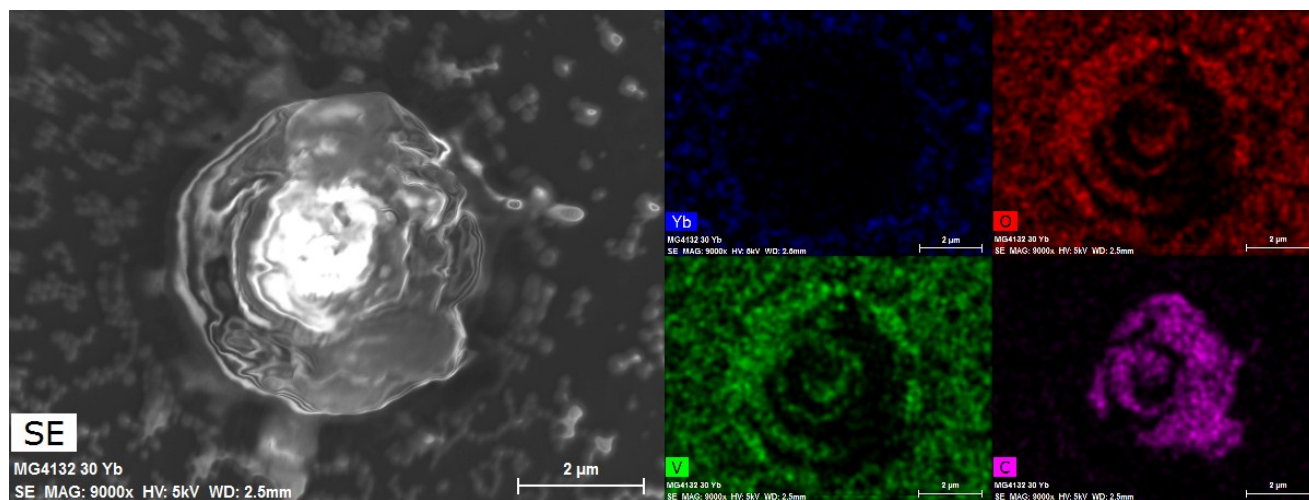

**Figure S4:** Elemental mapping of a non-crystalline area on a sample with 30 pulse%  $\text{Yb}(\text{thd})_3$ , showing that the amorphous material consists of vanadium, oxygen and carbon and contains no ytterbium.

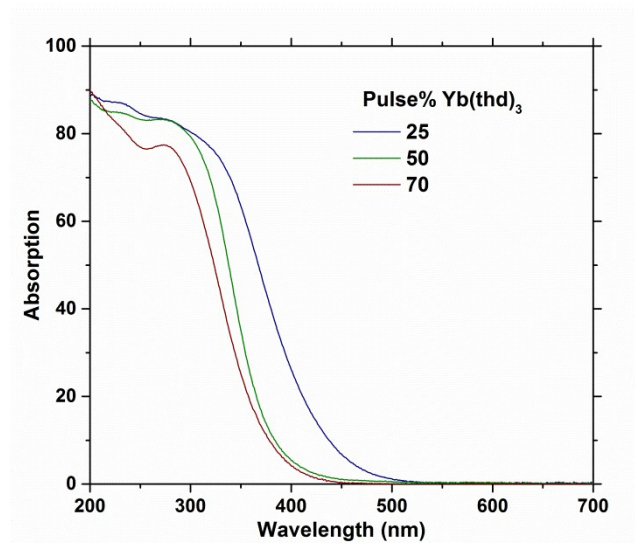

**Figure S5:** Absorption spectra of some of the as-deposited samples deposited on fused silica. The absorption of the fused silica substrate has not been subtracted.
